# Supplementary material for: Knockout of mlaA increases Escherichia coli virulence in a silkworm infection model
Source: PubMed Central journal article supplement (PMC9278758; doi:10.1371/journal.pone.0270166), 2022-07-13

Raw\_image for Fig 3A

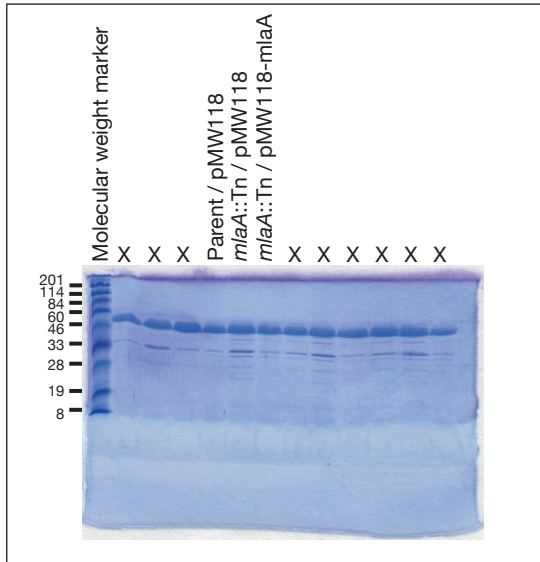

Raw\_image for Fig 3B

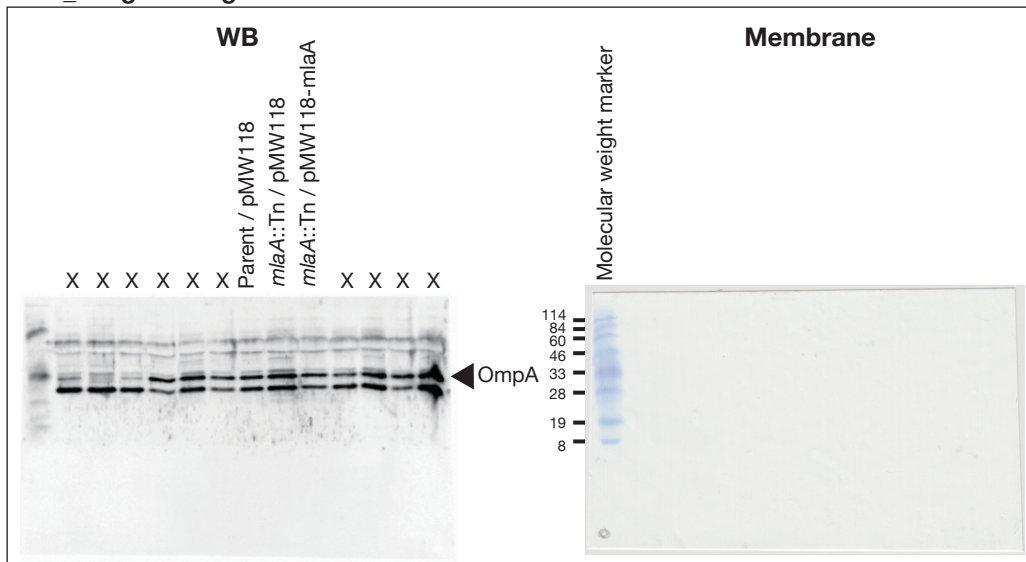

Raw\_image for Fig 3C

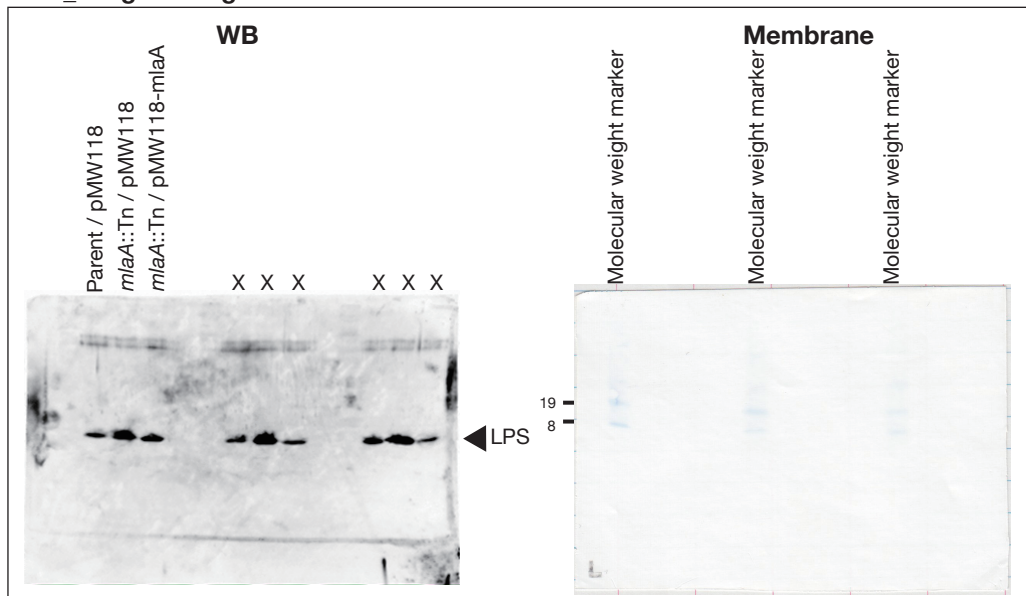

Supplement: pone.0270166.s001.pdf [file pone.0270166.s001.pdf]
